# Supplementary material for: Global and regional quality of care index for prostate cancer: an analysis from the Global Burden of Disease study 1990–2019
Source: Springer Nature journal article supplement (doi:10.1186/s13690-023-01087-2), 2023-04-26
Supplement: MOESM1 [file 25285756]

| Country                            | QCI   | Country                      | QCI   | Country                               | QCI   | Country                          | QCI   |                                  |       |
|------------------------------------|-------|------------------------------|-------|---------------------------------------|-------|----------------------------------|-------|----------------------------------|-------|
| United States of America           | 99.71 | Slovenia                     | 84.92 | Saint Lucia                           | 71.70 | Philippines                      | 51.95 | Mali                             | 28.10 |
| New Zealand                        | 98.04 | Russian Federation           | 84.92 | Trinidad and Tobago                   | 71.07 | Tonga                            | 50.42 | Senegal                          | 27.41 |
| Australia                          | 97.44 | Saudi Arabia                 | 84.43 | Ukraine                               | 70.88 | Yemen                            | 49.79 | Papua New Guinea                 | 27.32 |
| Finland                            | 96.14 | Slovakia                     | 83.93 | Mauritius                             | 70.82 | Mongolia                         | 47.52 | Madagascar                       | 26.97 |
| Austria                            | 95.77 | Mexico                       | 83.65 | Argentina                             | 70.75 | South Africa                     | 47.15 | Liberia                          | 26.84 |
| Italy                              | 95.56 | Croatia                      | 83.49 | Armenia                               | 70.65 | Indonesia                        | 46.80 | Kiribati                         | 26.26 |
| Switzerland                        | 95.51 | Latvia                       | 82.91 | Malaysia                              | 70.60 | Namibia                          | 45.93 | Burkina Faso                     | 25.86 |
| Germany                            | 94.20 | Oman                         | 82.28 | Iraq                                  | 70.45 | Tuvalu                           | 45.05 | Benin                            | 25.56 |
| Malta                              | 93.91 | Republic of Moldova          | 82.16 | Ecuador                               | 70.19 | Bhutan                           | 44.71 | Congo                            | 25.54 |
| Iceland                            | 93.90 | Nicaragua                    | 81.99 | Poland                                | 69.92 | Cambodia                         | 44.32 | Sierra Leone                     | 25.42 |
| Japan                              | 93.57 | Romania                      | 81.68 | Palestine                             | 69.61 | Fiji                             | 43.24 | Côte d'Ivoire                    | 25.11 |
| Netherlands                        | 93.26 | Iran (Islamic Republic of)   | 81.48 | Bosnia and Herzegovina                | 69.61 | Bangladesh                       | 43.23 | Lesotho                          | 24.97 |
| Ireland                            | 93.10 | Turkey                       | 81.22 | Bulgaria                              | 69.22 | India                            | 43.02 | Eritrea                          | 24.80 |
| Canada                             | 93.05 | Tunisia                      | 81.12 | Honduras                              | 68.71 | Micronesia (Federated States of) | 42.68 | Burundi                          | 24.15 |
| Sweden                             | 92.96 | El Salvador                  | 80.98 | Belize                                | 68.46 | Myanmar                          | 42.55 | Angola                           | 23.81 |
| Andorra                            | 92.68 | Qatar                        | 80.46 | Kazakhstan                            | 68.43 | Tajikistan                       | 41.77 | Mozambique                       | 23.78 |
| Luxembourg                         | 92.62 | Barbados                     | 79.70 | Egypt                                 | 68.18 | Solomon Islands                  | 40.90 | Niger                            | 21.61 |
| Norway                             | 92.61 | Hungary                      | 79.25 | Guam                                  | 68.05 | Sao Tome and Principe            | 39.97 | Guinea                           | 20.46 |
| France                             | 92.48 | China                        | 79.17 | Greenland                             | 67.93 | Timor-Leste                      | 38.89 | Democratic Republic of the Congo | 20.29 |
| Cyprus                             | 92.43 | Jordan                       | 78.66 | Dominican Republic                    | 67.74 | Ghana                            | 37.44 | Guinea-Bissau                    | 20.23 |
| Spain                              | 92.01 | Bahrain                      | 78.59 | Viet Nam                              | 67.07 | Djibouti                         | 36.44 | South Sudan                      | 19.90 |
| Belgium                            | 91.94 | Chile                        | 78.50 | Palau                                 | 67.01 | Mauritania                       | 36.27 | Chad                             | 17.84 |
| Portugal                           | 91.68 | Peru                         | 77.59 | Georgia                               | 66.80 | Gabon                            | 36.21 | Somalia                          | 16.40 |
| Estonia                            | 91.26 | Saint Kitts and Nevis        | 77.33 | Niue                                  | 66.40 | Zambia                           | 35.75 | Central African Republic         | 7.99  |
| Singapore                          | 91.17 | Brazil                       | 77.23 | Seychelles                            | 66.25 | Equatorial Guinea                | 35.67 |                                  |       |
| San Marino                         | 91.07 | United States Virgin Islands | 77.06 | Brunei Darussalam                     | 65.69 | Lao People's Democratic Republic | 35.31 |                                  |       |
| United Kingdom                     | 90.90 | Thailand                     | 76.76 | Guatemala                             | 64.90 | Kenya                            | 35.25 |                                  |       |
| Lithuania                          | 90.54 | Montenegro                   | 76.45 | Saint Vincent and the Grenadines      | 64.19 | Pakistan                         | 34.90 |                                  |       |
| Greece                             | 90.38 | Syrian Arab Republic         | 76.09 | Dominica                              | 63.85 | Haiti                            | 34.66 |                                  |       |
| Monaco                             | 90.25 | Maldives                     | 76.00 | Morocco                               | 63.20 | Nepal                            | 34.40 |                                  |       |
| Bermuda                            | 90.08 | Antigua and Barbuda          | 75.93 | Suriname                              | 61.57 | United Republic of Tanzania      | 34.31 |                                  |       |
| Israel                             | 90.06 | Sri Lanka                    | 75.57 | Democratic People's Republic of Korea | 61.54 | Nigeria                          | 34.08 |                                  |       |
| Republic of Korea                  | 89.62 | Jamaica                      | 75.56 | Kyrgyzstan                            | 58.63 | Rwanda                           | 33.50 |                                  |       |
| Taiwan (Province of China)         | 89.51 | Serbia                       | 74.57 | Turkmenistan                          | 58.26 | Marshall Islands                 | 33.45 |                                  |       |
| Costa Rica                         | 89.16 | Algeria                      | 74.56 | Azerbaijan                            | 58.21 | Uganda                           | 33.12 |                                  |       |
| Puerto Rico                        | 89.00 | Paraguay                     | 74.48 | Bolivia (Plurinational State of)      | 56.86 | Eswatini                         | 32.67 |                                  |       |
| Colombia                           | 88.96 | Libya                        | 74.12 | Guyana                                | 56.83 | Malawi                           | 31.80 |                                  |       |
| Kuwait                             | 88.81 | Uruguay                      | 73.99 | Cabo Verde                            | 55.67 | Ethiopia                         | 31.39 |                                  |       |
| Belarus                            | 88.57 | Northern Mariana Islands     | 73.81 | Tokelau                               | 55.22 | Cameroon                         | 31.20 |                                  |       |
| Czechia                            | 87.19 | United Arab Emirates         | 73.55 | Samoa                                 | 55.18 | Afghanistan                      | 31.14 |                                  |       |
| Panama                             | 86.89 | Albania                      | 73.29 | American Samoa                        | 54.52 | Comoros                          | 31.00 |                                  |       |
| Cuba                               | 85.81 | Cook Islands                 | 72.97 | Sudan                                 | 54.09 | Togo                             | 30.09 |                                  |       |
| Denmark                            | 85.51 | Bahamas                      | 72.65 | Nauru                                 | 53.33 | Gambia                           | 29.44 |                                  |       |
| Lebanon                            | 85.51 | North Macedonia              | 72.05 | Botswana                              | 53.13 | Vanuatu                          | 29.35 |                                  |       |
| Venezuela (Bolivarian Republic of) | 85.16 | Grenada                      | 71.75 | Uzbekistan                            | 53.04 | Zimbabwe                         | 28.53 |                                  |       |
