# Supplementary material for: Global and regional quality of care index for prostate cancer: an analysis from the Global Burden of Disease study 1990–2019
Source: Springer Nature journal article supplement (doi:10.1186/s13690-023-01087-2), 2023-04-26

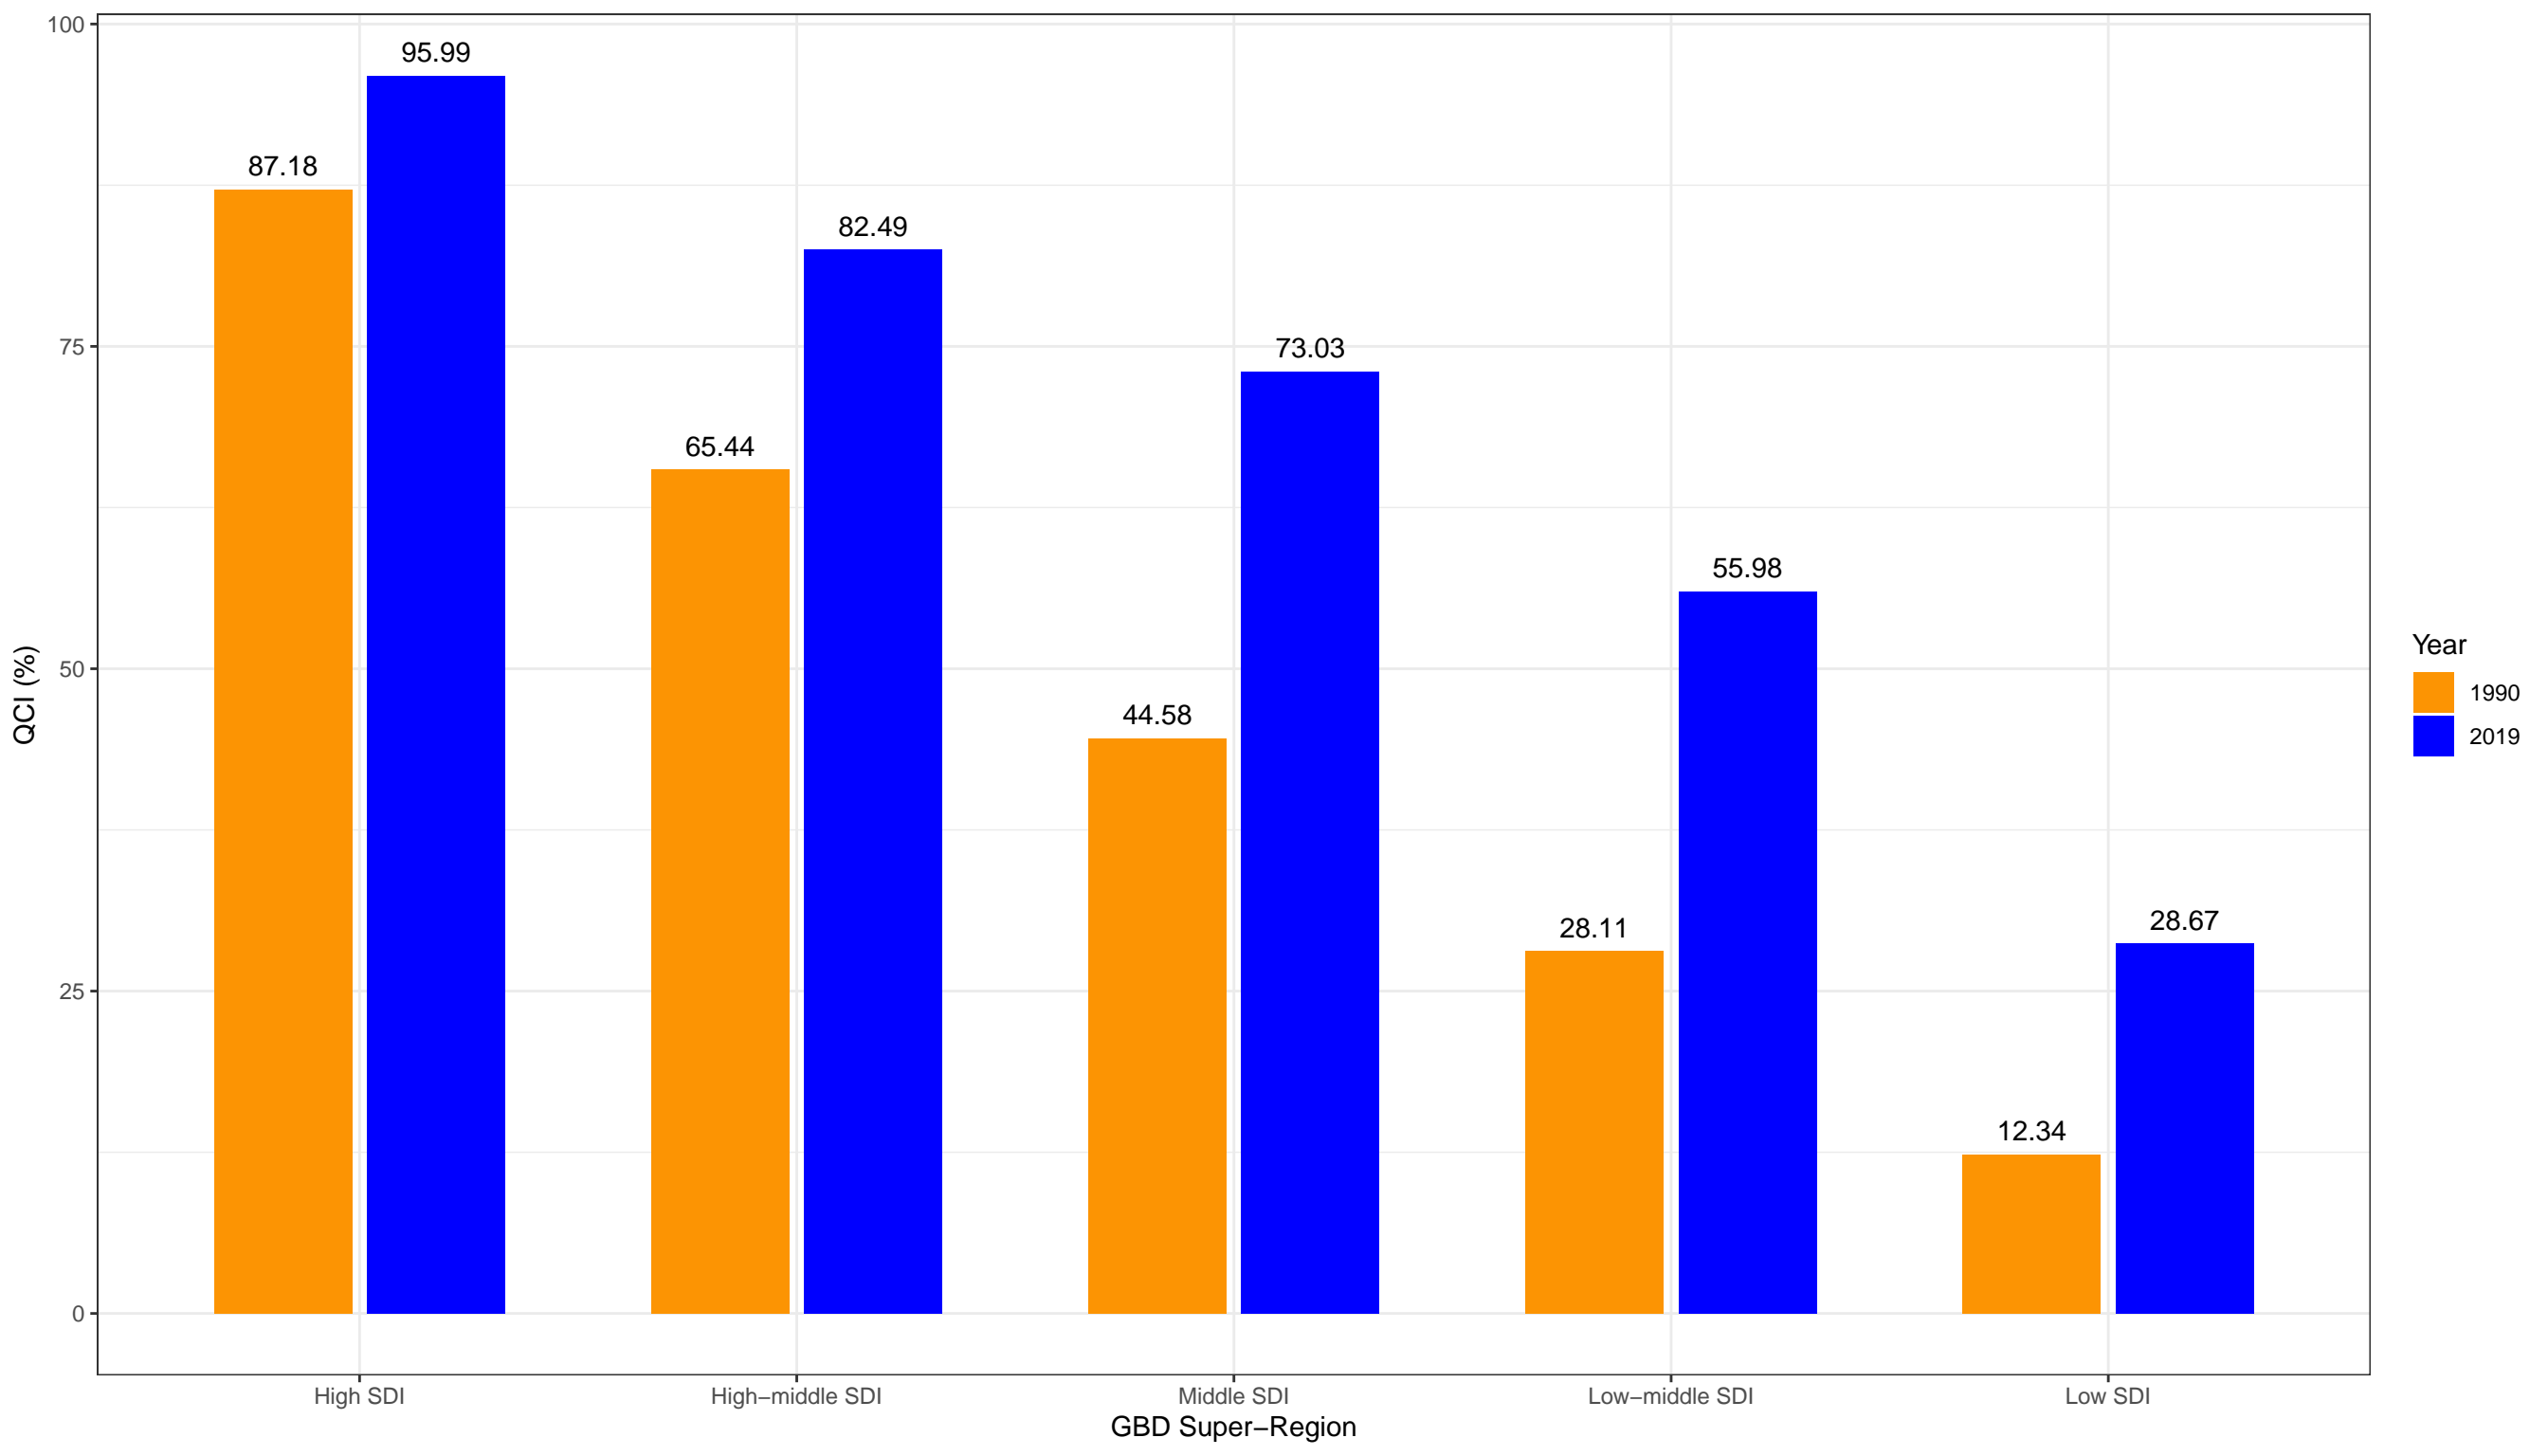

Supplement: MOESM2 [file 25285756]
