# Supplementary material for: Global and regional quality of care index for prostate cancer: an analysis from the Global Burden of Disease study 1990–2019
Source: Springer Nature journal article supplement (doi:10.1186/s13690-023-01087-2), 2023-04-26
Supplement: MOESM5 [file 25285756]

| Region  | Year          | Prevalence |        | Incidence |       | Deaths  |       | DALYs      |        | YLDs      |       | YLLs     |        |
|---------|---------------|------------|--------|-----------|-------|---------|-------|------------|--------|-----------|-------|----------|--------|
|         |               | Number     | Rate   | Number    | Rate  | Number  | Rate  | Number     | Rate   | Number    | Rate  | Number   | Rate   |
| Global  | 1990 (95% UI) | 3651763    | 223.3  | 524110    | 34.1  | 232999  | 18.1  | 4360506    | 286.3  | 334557    | 21.1  | 4025949  | 265.2  |
|         |               | (2880852   | (177.3 | (409133   | (26.8 | (191398 | (14.7 | (3528030   | (232.8 | (230361   | (14.5 | (3267352 | (218.1 |
|         |               | to         | to     | to        | to    | to      | to    | to         | to     | to        | to    | to       | to     |
|         |               | 4216030)   | 254.4) | 613006)   | 39.6) | 268882) | 21.2) | 4951007)   | 326.2) | 441154)   | 27.4) | 4549667) | 304.6) |
| Global  | 2019 (95% UI) | 10812979   | 286.8  | 1410452   | 38.6  | 486836  | 15.3  | 8644870    | 244.1  | 902697    | 24.3  | 7742173  | 219.7  |
|         |               | (9538731   | (253.3 | (1227900  | (33.6 | (420498 | (13.0 | (7548021   | (211.8 | (644209   | (17.4 | (6714725 | (189.8 |
|         |               | to         | to     | to        | to    | to      | to    | to         | to     | to        | to    | to       | to     |
|         |               | 13977819)  | 368.7) | 1825766)  | 49.8) | 593689) | 18.6) | 10559866)  | 297.7) | 1239866)  | 33.4) | 9327541) | 265.7) |
|         | Significant?  | *          |        | *         |       | *       |       | *          |        | *         |       | *        |        |
| Low SDI | 1990 (95% UI) | 49719      | 46.2   | 14667     | 16.2  | 14405   | 17.4  | 291434     | 290.9  | 6081      | 6.1   | 285352   | 284.8  |
|         |               | (38292 to  | (36.1  | (10948 to | (12.0 | (10567  | (12.8 | (213455 to | (213.6 | (4104 to  | (4.1  | (209169  | (209   |
|         |               | 58136)     | to     | 17314)    | to    | to      | to    | 346280)    | to     | 8289)     | to    | to       | to     |
|         |               |            | 53.6)  |           | 19.2) | 17042)  | 20.6) |            | 344.7) |           | 8.3)  | 338933)  | 337.2) |
| Low SDI | 2019 (95% UI) | 174620     | 74.5   | 35447     | 17.7  | 35219   | 19.5  | 681262     | 320.4  | 18452     | 8.5   | 662810   | 311.9  |
|         |               | (135461 to | (58.2  | (27190 to | (13.6 | (25881  | (14.2 | (501507 to | (235.1 | (12503 to | (5.8  | (488220  | (229.7 |
|         |               | 205746)    | to     | 41728)    | to    | to      | to    | 806489)    | to     | 25482)    | to    | to       | to     |
|         |               |            | 87.5)  |           | 20.7) | 41598)  | 22.9) |            | 378.2) |           | 11.6) | 786758)  | 368.7) |

| Region                | Year          | Prevalence                   |                         | Incidence                   |                        | Deaths                    |                        | DALYs                           |                           | YLDs                      |                      | YLLs                           |                           |
|-----------------------|---------------|------------------------------|-------------------------|-----------------------------|------------------------|---------------------------|------------------------|---------------------------------|---------------------------|---------------------------|----------------------|--------------------------------|---------------------------|
|                       |               | Number                       | Rate                    | Number                      | Rate                   | Number                    | Rate                   | Number                          | Rate                      | Number                    | Rate                 | Number                         | Rate                      |
|                       | Significant?  | *                            | *                       | *                           | *                      | *                         | *                      | *                               | *                         | *                         | *                    | *                              | *                         |
|                       | 1990 (95% UI) | 117088<br>(101629 to 139416) | 43.7<br>(38.2 to 52.4)  | 27668<br>(23401 to 32999)   | 12.4<br>(10.4 to 15.0) | 24287<br>(19955 to 28874) | 12.3<br>(10.1 to 14.9) | 467412<br>(384211 to 546827)    | 193.1<br>(159.1 to 229.1) | 12450<br>(9139 to 16279)  | 5.0<br>(3.7 to 6.6)  | 454962<br>(372866 to 533780)   | 188.1<br>(154.3 to 223.1) |
| <b>Low-middle SDI</b> | 2019 (95% UI) | 601917<br>(515664 to 701809) | 95.6<br>(82.3 to 111.2) | 100389<br>(86423 to 117896) | 17.8<br>(15.3 to 21.0) | 66632<br>(56325 to 78818) | 13.5<br>(11.4 to 16.0) | 1215480<br>(1018740 to 1427257) | 212.9<br>(179.3 to 250.8) | 55219<br>(40494 to 72050) | 9.2<br>(6.8 to 12.1) | 1160261<br>(975483 to 1358506) | 203.7<br>(171.7 to 240.6) |
|                       | Significant?  | *                            | *                       | *                           | *                      | *                         | *                      | *                               | *                         | *                         | *                    | *                              | *                         |
| <b>Middle SDI</b>     | 1990 (95% UI) | 288383<br>(247218 to 331114) | 64.7<br>(56.2 to 74.6)  | 53502<br>(45509 to 61366)   | 14.5<br>(12.5 to 16.9) | 39007<br>(32789 to 44649) | 12.6<br>(10.8 to 14.8) | 743444<br>(618726 to 838434)    | 191.2<br>(160.8 to 220.2) | 27330<br>(19883 to 35704) | 6.7<br>(4.9 to 8.6)  | 716114<br>(595715 to 807129)   | 184.5<br>(154.6 to 211.7) |
|                       | 2019 (95% UI) | 1715574<br>(1491963 to ...)  | 148.7<br>(129.9 to ...) | 227646<br>(195373 to ...)   | 21.7<br>(18.6 to ...)  | 112213<br>(94003 to ...)  | 12.8<br>(10.6 to ...)  | 2026389<br>(1710329 to ...)     | 197.2<br>(165.6 to ...)   | 147218<br>(106339 to ...) | 13.4<br>(9.7 to ...) | 1879172<br>(1584713 to ...)    | 183.9<br>(154.2 to ...)   |

| Region                     | Year             | Prevalence                 |                        | Incidence                |                      | Deaths                  |                      | DALYs                      |                        | YLDs                     |                      | YLLs                       |                        |
|----------------------------|------------------|----------------------------|------------------------|--------------------------|----------------------|-------------------------|----------------------|----------------------------|------------------------|--------------------------|----------------------|----------------------------|------------------------|
|                            |                  | Number                     | Rate                   | Number                   | Rate                 | Number                  | Rate                 | Number                     | Rate                   | Number                   | Rate                 | Number                     | Rate                   |
|                            |                  | to                         | to                     | to                       | to                   | to                      | to                   | to                         | to                     | to                       | to                   | to                         | to                     |
|                            |                  | 2047469)                   | 177.3)                 | 271989)                  | 25.8)                | 133289)                 | 15.2)                | 2399588)                   | 234.8)                 | 195471)                  | 17.7)                | 2223715)                   | 218.7)                 |
|                            | Significant?     | *                          | *                      | *                        | *                    | *                       | *                    | *                          | *                      | *                        | *                    | *                          | *                      |
|                            |                  | 664953                     | 152.5                  | 100950                   | 25.3                 | 55146                   | 16.4                 | 1047288                    | 263.5                  | 61704                    | 14.7                 | 985584                     | 248.8                  |
|                            | 1990 (95%<br>UI) | (572161 to<br>841878)      | (132.4<br>to<br>191.0) | (87172 to<br>131573)     | (21.9<br>to<br>33.0) | (48232<br>to<br>70500)  | (14.2<br>to<br>21.2) | (905993 to<br>1326208)     | (228.0<br>to<br>337.2) | (44675 to<br>84260)      | (10.6<br>to<br>19.8) | (853849<br>to<br>1250181)  | (216.6<br>to<br>317.5) |
| <b>High-middle<br/>SDI</b> |                  | 2398222                    | 259.3                  | 317960                   | 35.7                 | 114276                  | 14.8                 | 2025327                    | 235.2                  | 204081                   | 22.4                 | 1821246                    | 212.7                  |
|                            | 2019 (95%<br>UI) | (2093974<br>to<br>3032510) | (227.3<br>to<br>325.8) | (274781<br>to<br>403994) | (30.4<br>to<br>45.1) | (97026<br>to<br>142019) | (12.5<br>to<br>18.3) | (1759184<br>to<br>2485485) | (202.7<br>to<br>288.0) | (145478<br>to<br>275225) | (16.0<br>to<br>30.2) | (1566544<br>to<br>2223170) | (182.4<br>to<br>260.4) |
|                            | Significant?     | *                          | *                      | *                        | *                    | *                       | *                    | *                          | *                      | *                        | *                    | *                          | *                      |
|                            |                  | 2529090                    | 571.5                  | 326925                   | 75.2                 | 99936                   | 25.7                 | 1807072                    | 426.3                  | 226759                   | 51.7                 | 1580313                    | 374.6                  |
| <b>High SDI</b>            | 1990 (95%<br>UI) | (1890053<br>to<br>2894921) | (430.5<br>to<br>653.2) | (233497<br>to<br>380992) | (53.9<br>to<br>87.9) | (74327<br>to<br>116052) | (19.2<br>to<br>30.1) | (1326671<br>to<br>2106492) | (313.8<br>to<br>496.4) | (148240<br>to<br>300120) | (33.9<br>to<br>67.9) | (1169264<br>to<br>1855154) | (278.9<br>to<br>438.7) |

| Region | Year             | Prevalence                 |                        | Incidence                |                       | Deaths                   |                      | DALYs                      |                        | YLDs                     |                      | YLLs                       |                        |
|--------|------------------|----------------------------|------------------------|--------------------------|-----------------------|--------------------------|----------------------|----------------------------|------------------------|--------------------------|----------------------|----------------------------|------------------------|
|        |                  | Number                     | Rate                   | Number                   | Rate                  | Number                   | Rate                 | Number                     | Rate                   | Number                   | Rate                 | Number                     | Rate                   |
|        |                  | 5914063                    | 678.6                  | 696286                   | 79.7                  | 157989                   | 17.6                 | 2687711                    | 303.5                  | 477003                   | 54.6                 | 2210707                    | 248.9                  |
|        | 2019 (95%<br>UI) | (5075402<br>to<br>8210871) | (581.4<br>to<br>940.4) | (588170<br>to<br>994359) | (67.3<br>to<br>113.7) | (131249<br>to<br>215133) | (14.7<br>to<br>23.9) | (2297889<br>to<br>3708190) | (259.1<br>to<br>417.3) | (335025<br>to<br>703623) | (38.3<br>to<br>80.3) | (1870801<br>to<br>3029625) | (210.6<br>to<br>339.8) |
|        | Significant?     | *                          |                        | *                        |                       | *                        |                      | *                          |                        | *                        |                      | *                          |                        |

*DALYs: disability-adjusted life years; YLDs: years lived with disability; YLL: years of life lost*
