# Supplementary material for: Global and regional quality of care index for prostate cancer: an analysis from the Global Burden of Disease study 1990–2019
Source: Springer Nature journal article supplement (doi:10.1186/s13690-023-01087-2), 2023-04-26
Supplement: MOESM7 [file 25285756]

---

| <b>Rank</b> | <b>Country</b>    | <b>1990 QCI</b> | <b>2019 QCI</b> | <b>QCI change</b> |
|-------------|-------------------|-----------------|-----------------|-------------------|
| <b>1</b>    | Maldives          | 34.38           | 76.00           | +41.62            |
| <b>2</b>    | China             | 39.82           | 79.17           | +39.35            |
| <b>3</b>    | Equatorial Guinea | 0.00            | 35.67           | +35.67            |
| <b>4</b>    | Bhutan            | 10.19           | 44.71           | +34.52            |
| <b>5</b>    | Turkey            | 48.13           | 81.22           | +33.10            |
| <b>6</b>    | Bangladesh        | 10.73           | 43.23           | +32.50            |
| <b>7</b>    | Peru              | 45.82           | 77.59           | +31.77            |
| <b>8</b>    | Bolivia           | 25.15           | 56.86           | +31.71            |
| <b>9</b>    | Vietnam           | 35.59           | 67.07           | +31.48            |
| <b>10</b>   | Republic of Korea | 58.19           | 89.62           | +31.43            |

---
