# Supplementary material for: Global and regional quality of care index for prostate cancer: an analysis from the Global Burden of Disease study 1990–2019
Source: Springer Nature journal article supplement (doi:10.1186/s13690-023-01087-2), 2023-04-26
Supplement: MOESM8 [file 25285756]

---

| <b>Rank</b> | <b>Country</b>                   | <b>1990 QCI</b> | <b>2019 QCI</b> | <b>QCI change</b> |
|-------------|----------------------------------|-----------------|-----------------|-------------------|
| <b>204</b>  | Zimbabwe                         | 28.16           | 28.53           | +0.36             |
| <b>203</b>  | Tajikistan                       | 41.24           | 41.77           | +0.54             |
| <b>202</b>  | Dominica                         | 62.52           | 63.85           | +1.32             |
| <b>201</b>  | Uzbekistan                       | 49.05           | 53.04           | +3.99             |
| <b>200</b>  | United States of America         | 94.67           | 99.71           | +5.04             |
| <b>199</b>  | Saint Vincent and the Grenadines | 58.68           | 64.19           | +5.51             |
| <b>198</b>  | Central African Republic         | 2.16            | 7.99            | +5.83             |
| <b>197</b>  | Lithuania                        | 84.39           | 90.54           | +6.15             |
| <b>196</b>  | New Zealand                      | 91.72           | 98.04           | +6.32             |
| <b>195</b>  | Monaco                           | 83.80           | 90.25           | +6.45             |

---
